# Supplementary material
Source: PubMed Central journal article supplement (PMC8093264)

**a**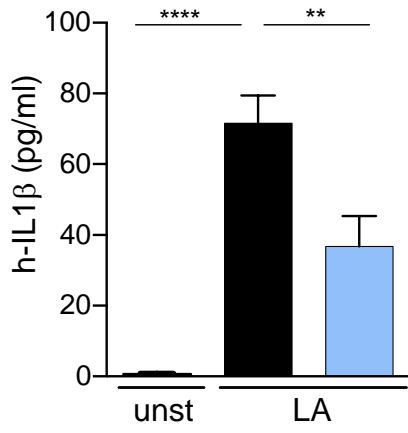**b**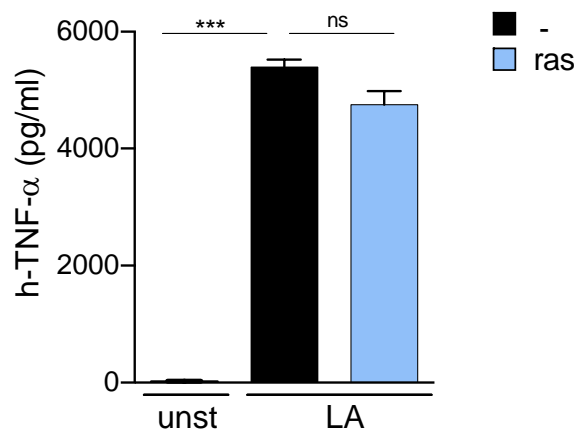

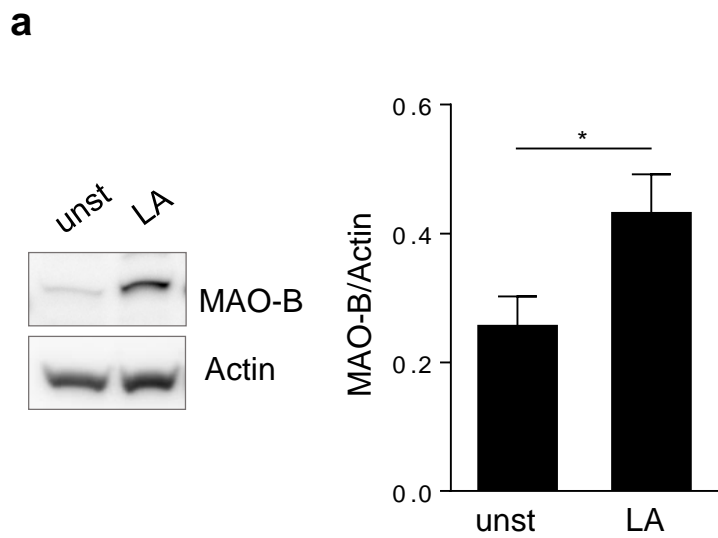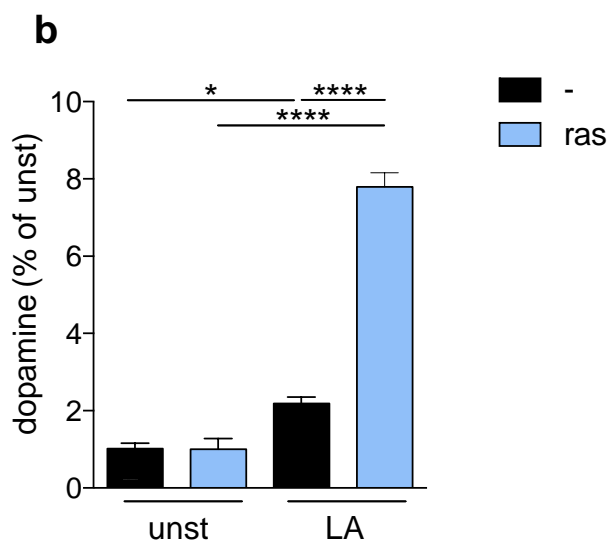

Fig. S2

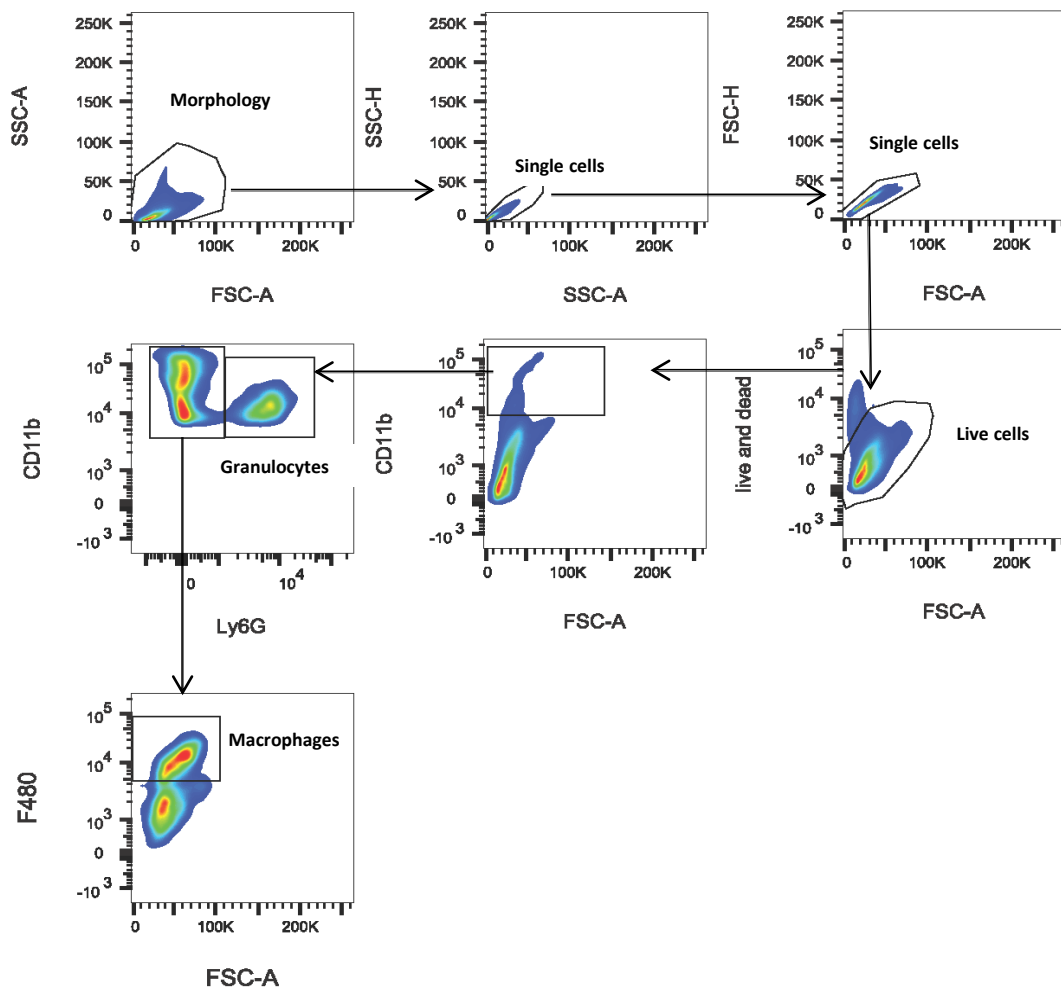

Fig. S3

**a**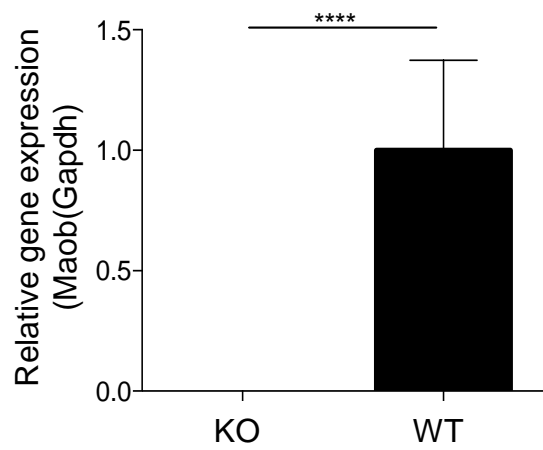**b**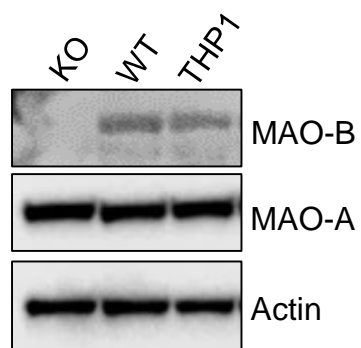

Supplement: 41423_2020_441_MOESM2_ESM.pdf [file 41423_2020_441_MOESM2_ESM.pdf]
